# Supplementary material
Source: PubMed Central journal article supplement (PMC6295722)
Supplement: supp_RA118.004516_138885_2_supp_214133_pg212x.pdf [file supp_RA118.004516_138885_2_supp_214133_pg212x.pdf]

## **Probing the contribution of individual polypeptide GalNAc-transferase isoforms to the O-glycoproteome by inducible expression in isogenic cell lines**

John Hintze<sup>1</sup>, Zilu Ye<sup>1</sup>, Yoshiki Narimatsu<sup>1</sup>, Thomas Daugbjerg Madsen<sup>1</sup>, Hiren Joshi<sup>1</sup>, Adam Linstedt<sup>2</sup>, Collin Bachert<sup>2</sup>, Ulla Mandel<sup>1</sup>, Eric P. Bennett<sup>1</sup>, Sergey Y. Vakhrushev<sup>1</sup>, Katrine T. Schjoldager<sup>1,3</sup>

<sup>1</sup>Copenhagen Center for Glycomics, Departments of Cellular and Molecular Medicine and School of Dentistry, Faculty of Health Sciences, University of Copenhagen, Blegdamsvej 3, DK-2200 Copenhagen N, Denmark.

<sup>2</sup>Department of Biological Sciences, Carnegie Mellon University, Pittsburgh, United States

**Running title:** O-glycoproteome contribution of individual polypeptide GalNAc-transferases

**To whom correspondence should be addressed:** Katrine T. Schjoldager; <sup>1</sup>Copenhagen Center for Glycomics, Dept. of Cellular and Molecular Medicine, University of Copenhagen, Blegdamsvej 3, DK-2200 Copenhagen N, Denmark. Tel.: 45-35327797; Fax: 45-35367980; E-mail: schjoldager@sund.ku.dk.

**Keywords:** Inducible expression, O-glycosylation, Glycoproteomics, GalNAc-transferase, O-GalNAc, Protein glycosylation, Mucin type, Glycan, Glycosyltransferase

---

### **Contents:**

**Supplementary Figure 1**  
**Supplementary Figure 2**  
**Supplementary Figure 3**  
**Supplementary Figure 4**  
**Supplementary Figure 5**  
**Supplementary Figure 6**  
**Supplementary Figure 7**  
**Supplementary Figure 8**  
**Supplementary Figure 9**  
**Supplementary Figure 10**  
**Supplementary Figure 11**  
**Supplementary Figure 12**  
**Supplementary Figure 13**  
**Supplementary Figure 14**  
**Supplementary Figure 15**  
**Supplementary Table 1**  
**Supplementary Table 2**  
**Supplementary Table 3**  
**Supplementary References**

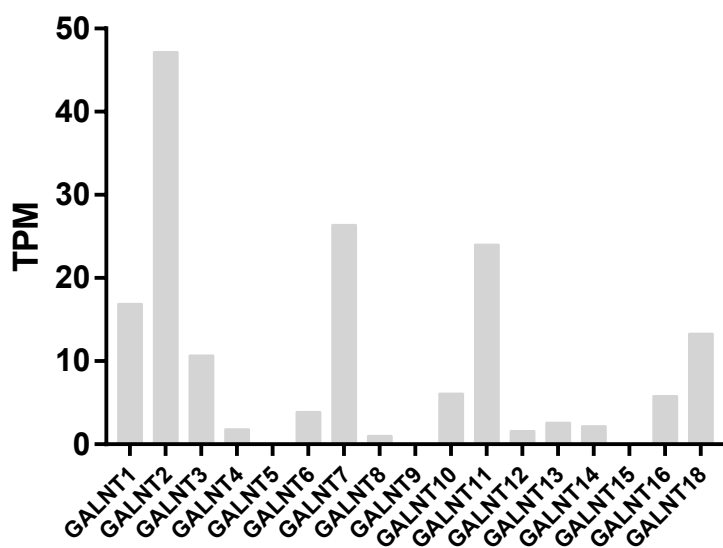

**Figure S1. HEK293 GALNT expression profile.** RNA-seq expression data of the human *GALNT* gene family in HEK293 cells. data downloaded from the human protein atlas (1) (<https://www.proteinatlas.org/about/download>). *GALNT2*, *GALNT7* and *GALNT11* are the most highly expressed isoforms in HEK293.

**A**

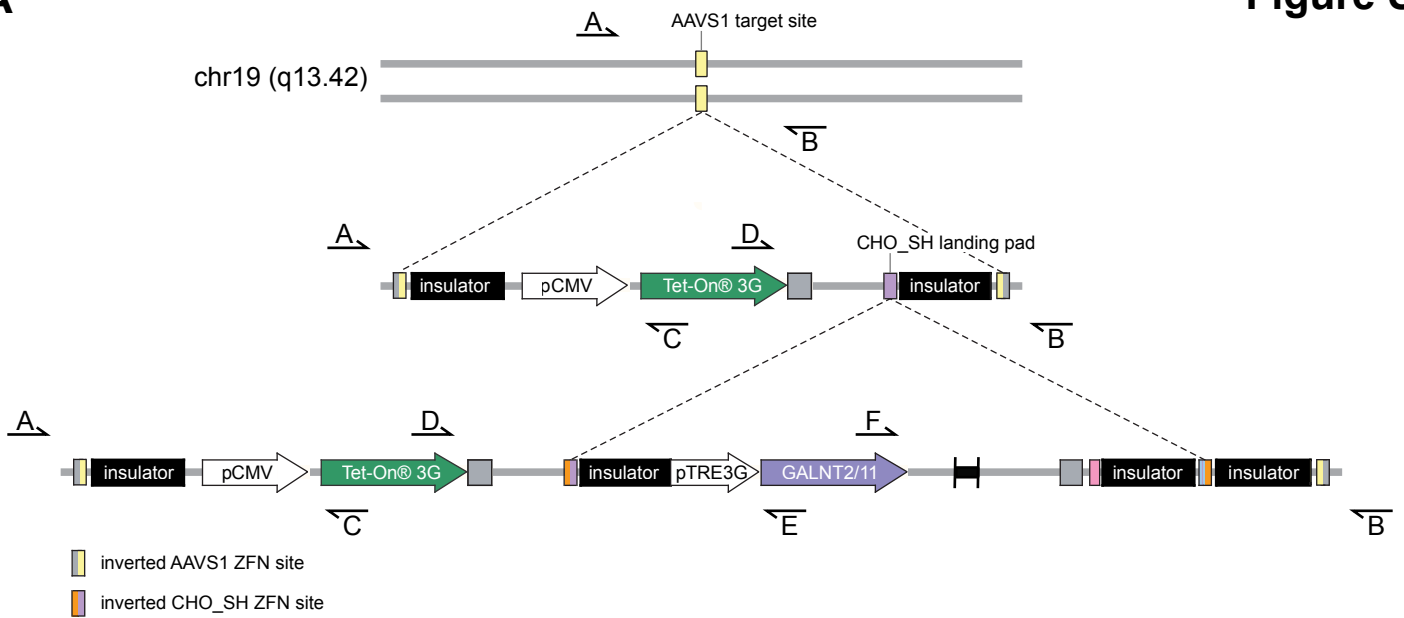

**B**

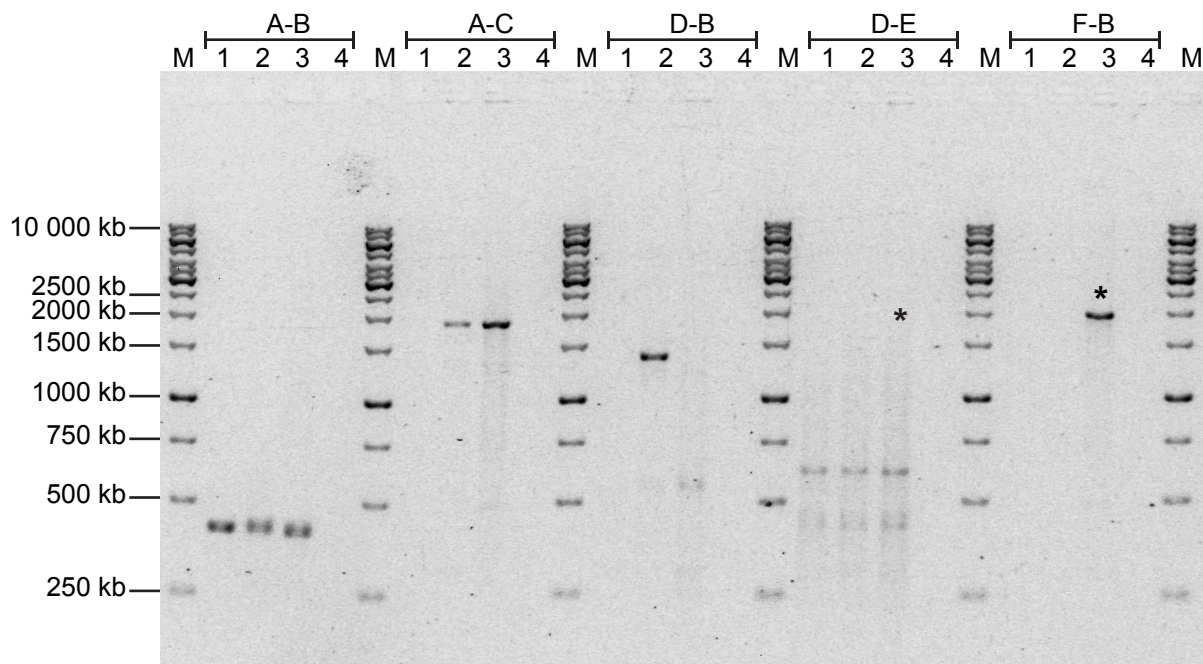

**C**

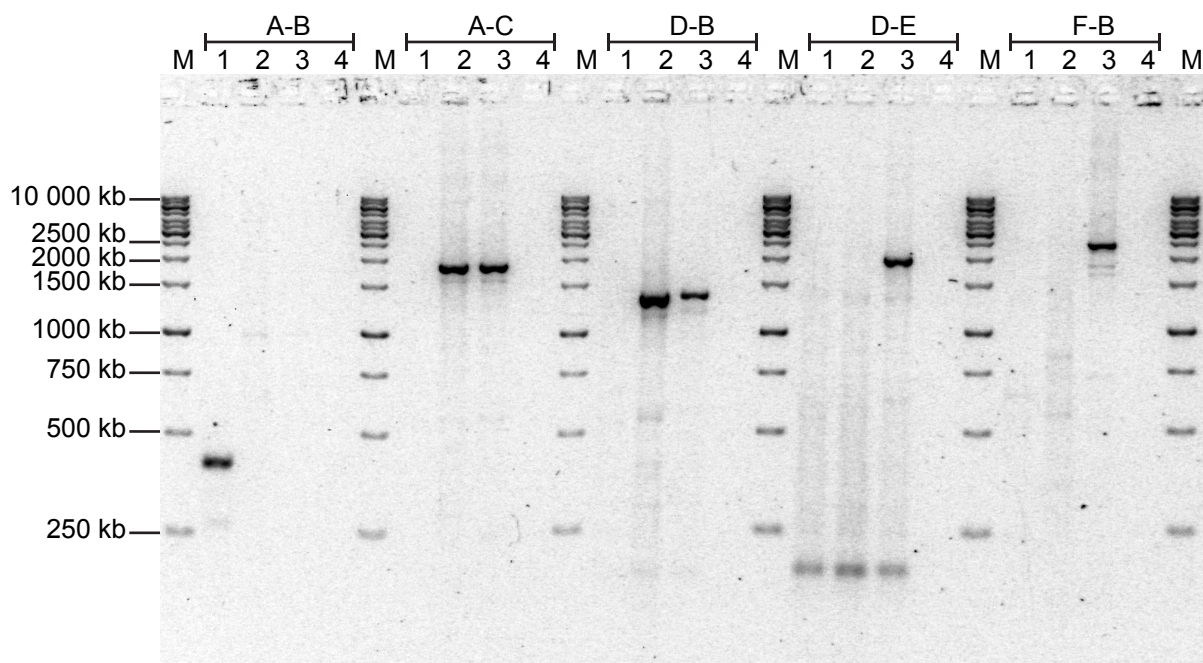

**Figure S2. Confirmation of KI architecture by junction PCR. A)** Graphic depiction of primer (A-E) binding sites. **B)** Junction PCR reactions for HEK WT, HEK $\Delta$ T2 enriched Tet-On bulk and HEK<sup>ind</sup>T2 with indicated primer pairs, separated on a 2 % agarose gel. All reactions for HEK<sup>ind</sup>T2 produced the expected size, except for the internal (D-E) and right (F-B) junction. The expected products are indicated with an asterisk. Positive WT (A-B) and left junction (A-C) for HEK<sup>ind</sup>T2 reactions indicates mono-allelic integration of the Tet-On cassette. The right junction (F-B) of the inducible *GALNT2* cassette is positive but 500 bp smaller than the expected size. Sanger sequencing revealed it to be due to lack of one insulator element. **C)** Junction PCR reactions for HEK WT, HEK  $\Delta$ T11 Tet-On clone 58 and HEK<sup>ind</sup>T11 with indicated primer pairs, separated on a 2 % agarose gel. All reactions produce the expected product sizes. Negative WT (A-B), positive left (A-C) and right (D-B) junction indicate that HEK $\Delta$ T11 Tet-On clone 58 is bi-allelic for the first KI. Positive left (A-C), right (D-B), internal (D-E) second right (F-B) junction for HEK<sup>ind</sup>T11, all with the expected sizes, indicate that the clone is mono-allelic for the second KI.

**A**

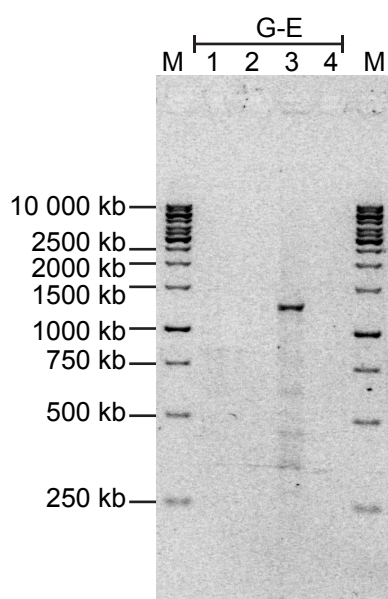

1) HEK WT 2) HEK  $\Delta$ T2 enriched Tet-On bulk 3) HEK<sup>ind</sup>T2 4) neg ctrl

**Figure S3**

**B**

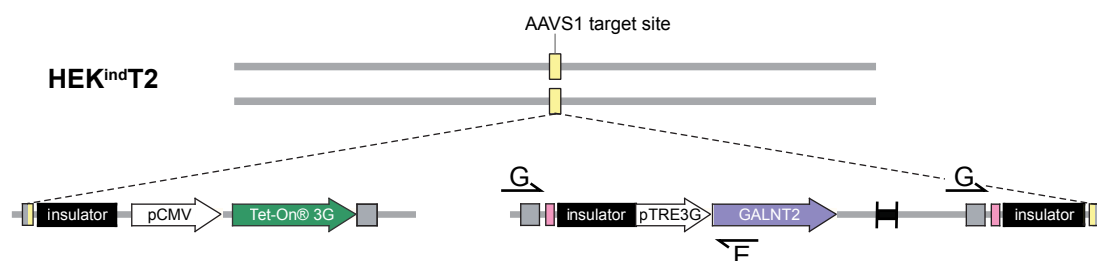

**C**

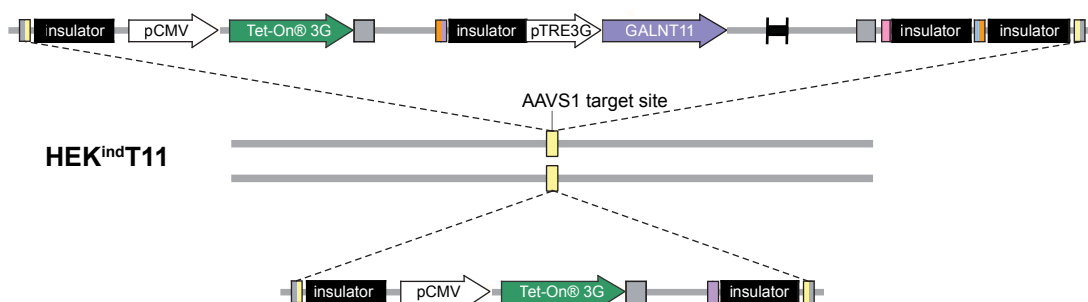

**Figure S3. Detailed mapping of HEK<sup>ind</sup>T2 architecture by junction PCR.** **A)** Agarose gel separation of additional junction PCR for HEK<sup>ind</sup>T2 using primer pair G-E generated a product of 1300 bp. This PCR product was sequenced confirming a junction between two *GALNT2* cassettes. Further PCR analysis using primers binding 3' of primer G did not result in product. We hypothesize that the unforeseen tandem integration of the *GALNT2* cassette caused truncation of the 3' end of the first cassette. **B)** Suggested architecture of the inducible platform for HEK<sup>ind</sup>T2. **C)** Suggested architecture of the inducible platform for HEK<sup>ind</sup>T11.

**A****Figure S4**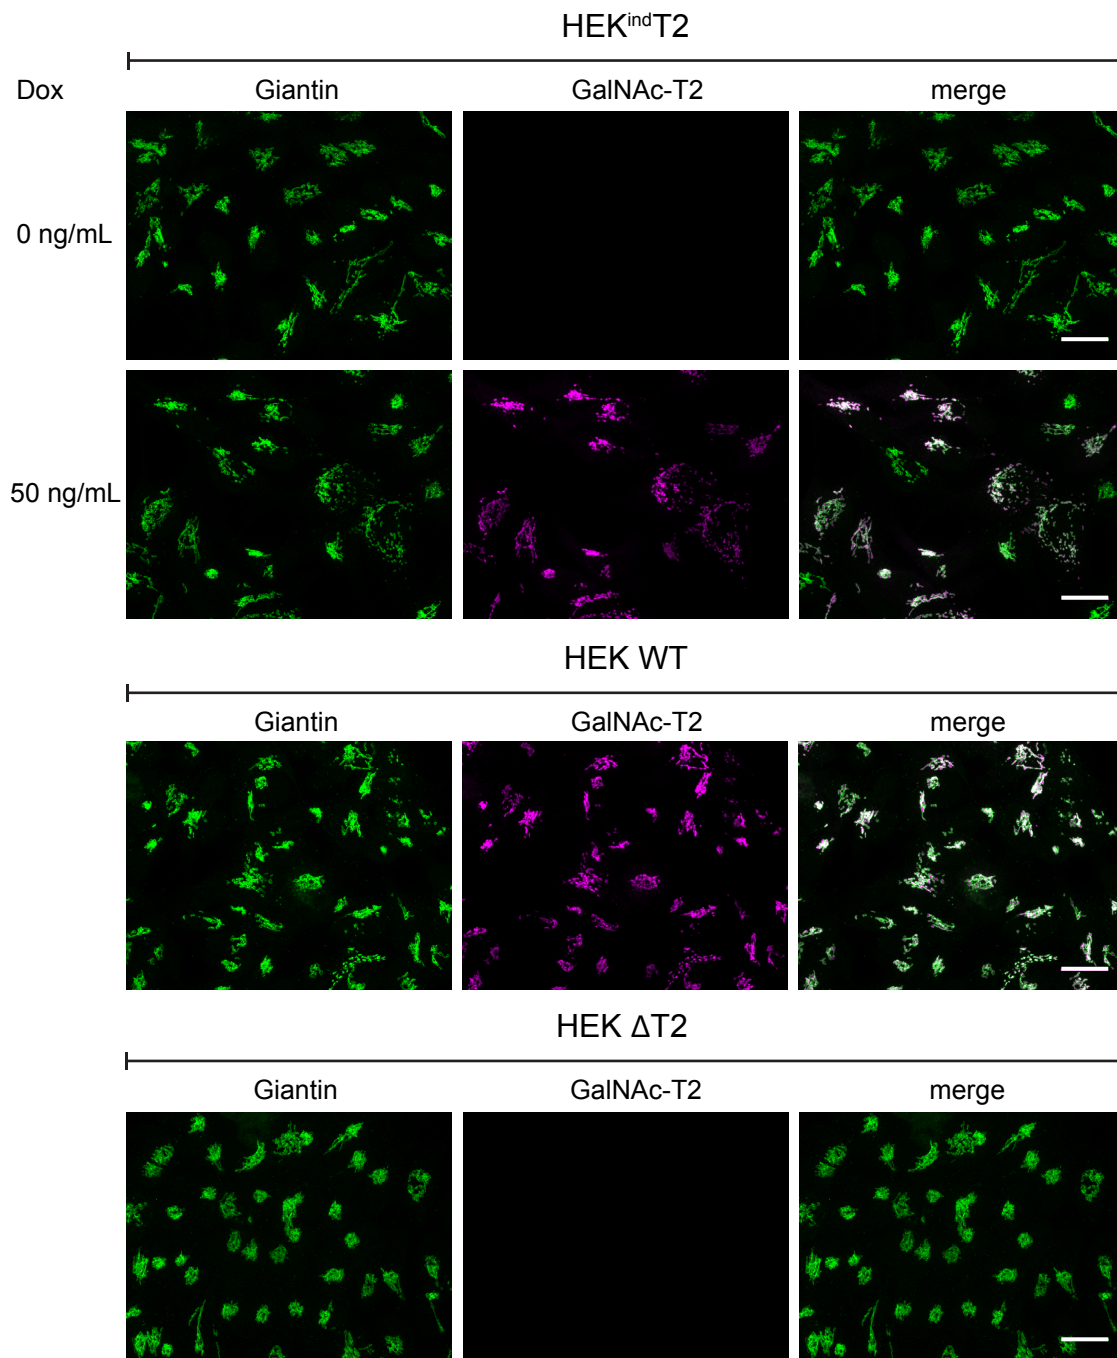

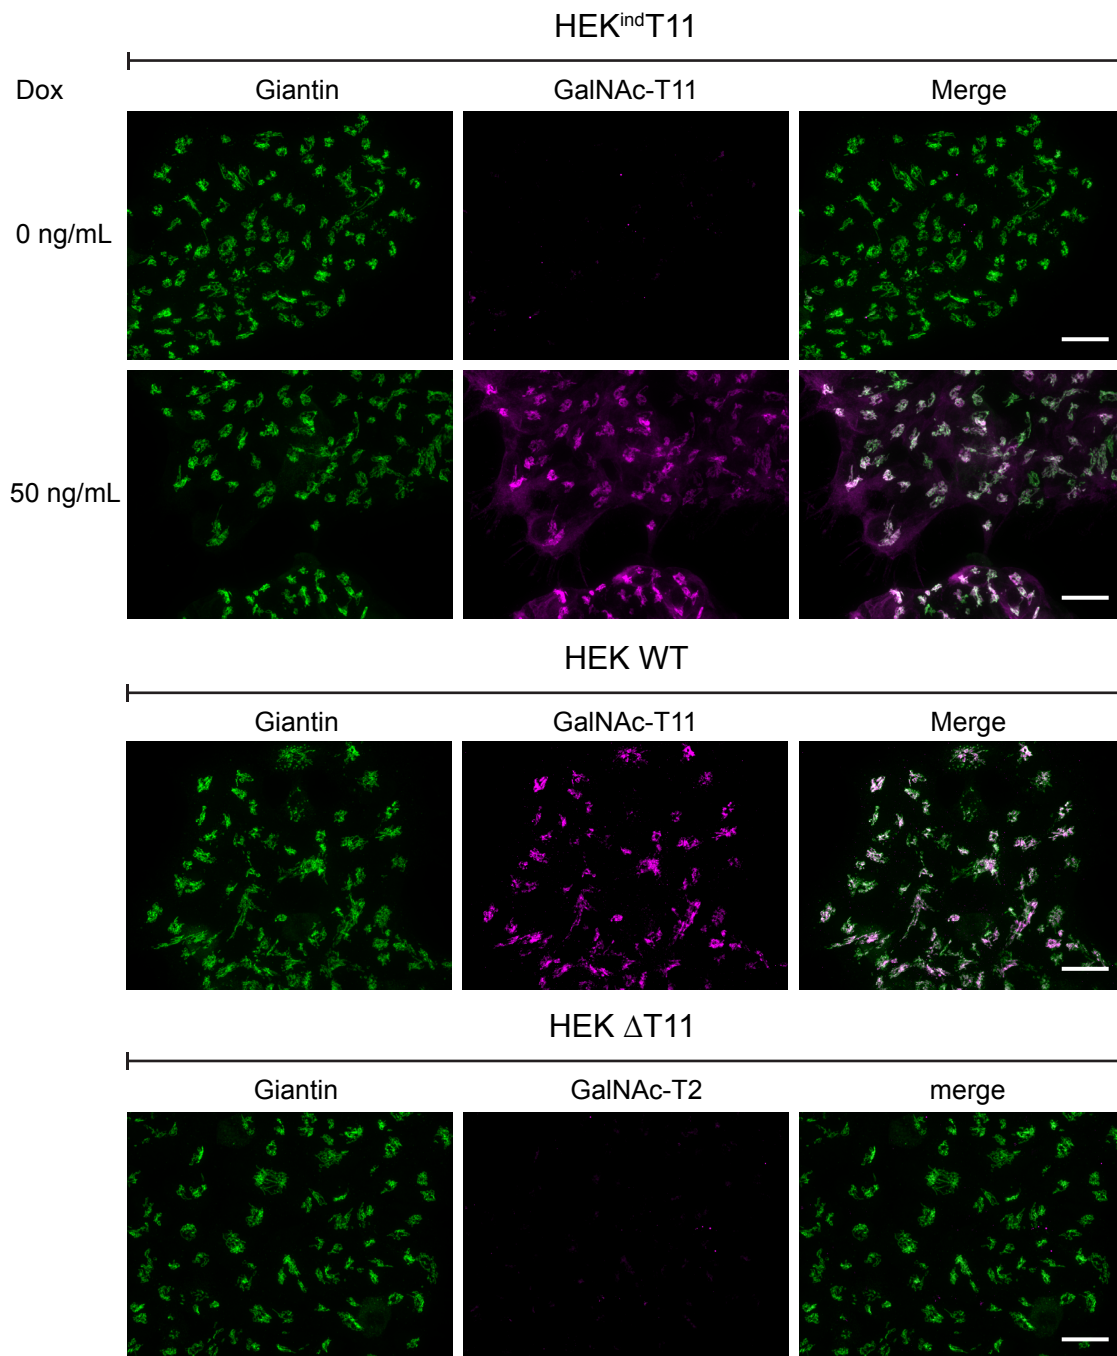

**Figure S4. Sub-cellular localization of induced GalNAc-T2 and T11.** Immunofluorescence stainings of HEK<sup>ind</sup>T2 (A) or HEK<sup>ind</sup>T11 (B) cells grown on coverslips stained with antibodies against Golgi marker Giantin, GalNAc-T2 or GalNAc-T11, and subsequently imaged by confocal microscopy. Induced GalNAc-T2 and GalNAc-T11 colocalizes with Giantin as in HEK WT cells. Scale bar = 20  $\mu$ m.

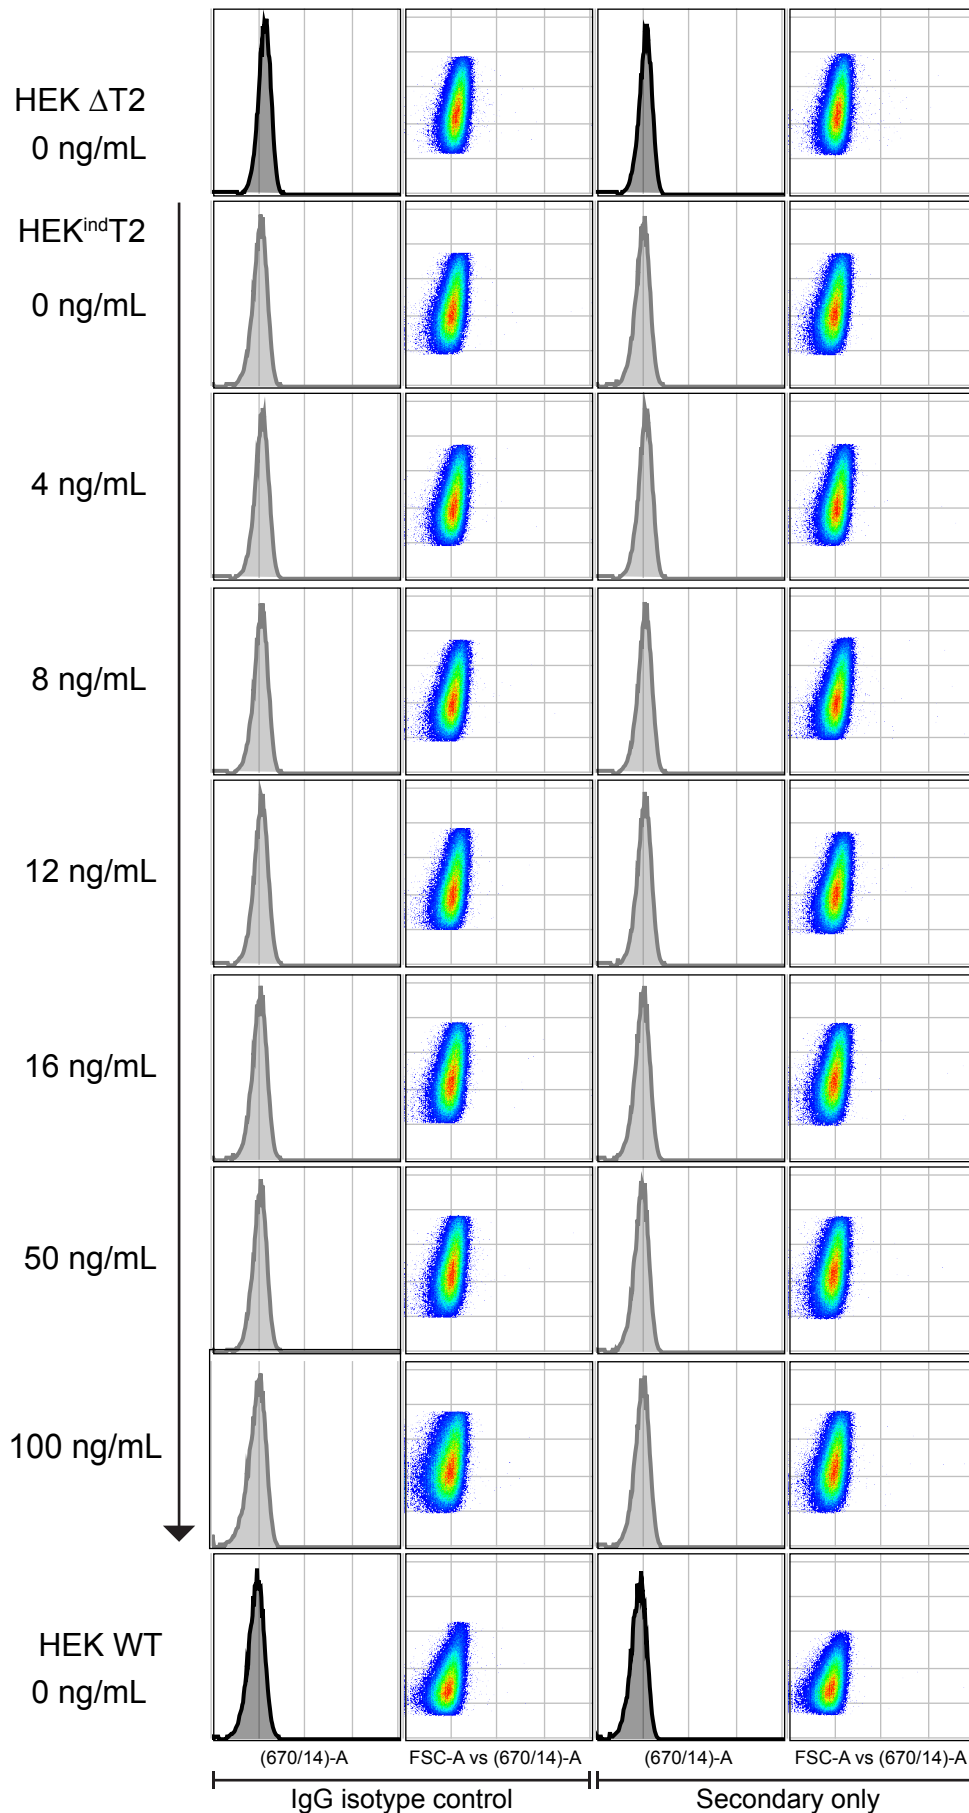

**Figure S5. Control stainings for flow cytometric quantification of induced GalNAc-T2.** HEK  $\Delta$ T2, HEK<sup>ind</sup>T2 and HEK WT cells were seeded, cultured for 24 h and then induced with doxycycline at indicated concentration for 48 h before fixation, permeabilization and staining with anti-IgG isotype control in combination with Alexa Fluor 647 secondary antibody or Alexa Fluor 647 secondary antibody only. Neither control show any variation between samples.



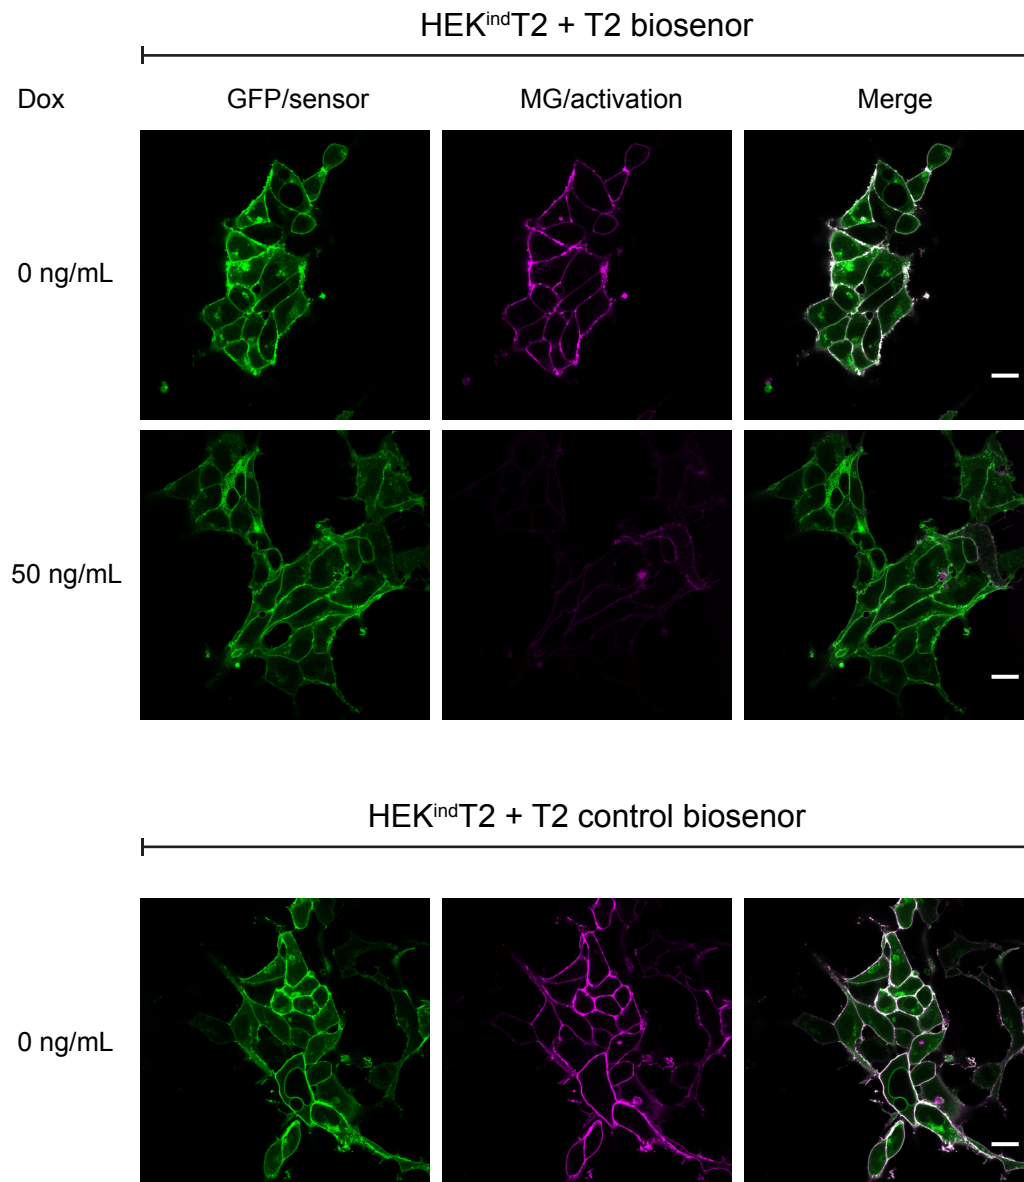

**Figure S6. Live cell imaging of GalNAc-T2 specific biosensor activation.** HEK<sup>ind</sup>T2 cells stably expressing T2 biosensor or control T2 biosensor ( $\Delta$ gly) were grown on coverslips and induced for 48 h before being incubated with cell impermeable malachite green (MG) and imaged by fluorescence microscopy. The sensor traffics to the cell surface and glycosylation by induced GalNAc-T2 leads to decrease in MG signal. Non-induced cells display strong sensor activation and MG signal, comparable to that of cells expressing the control biosensor. Scale bar = 20  $\mu$ m.

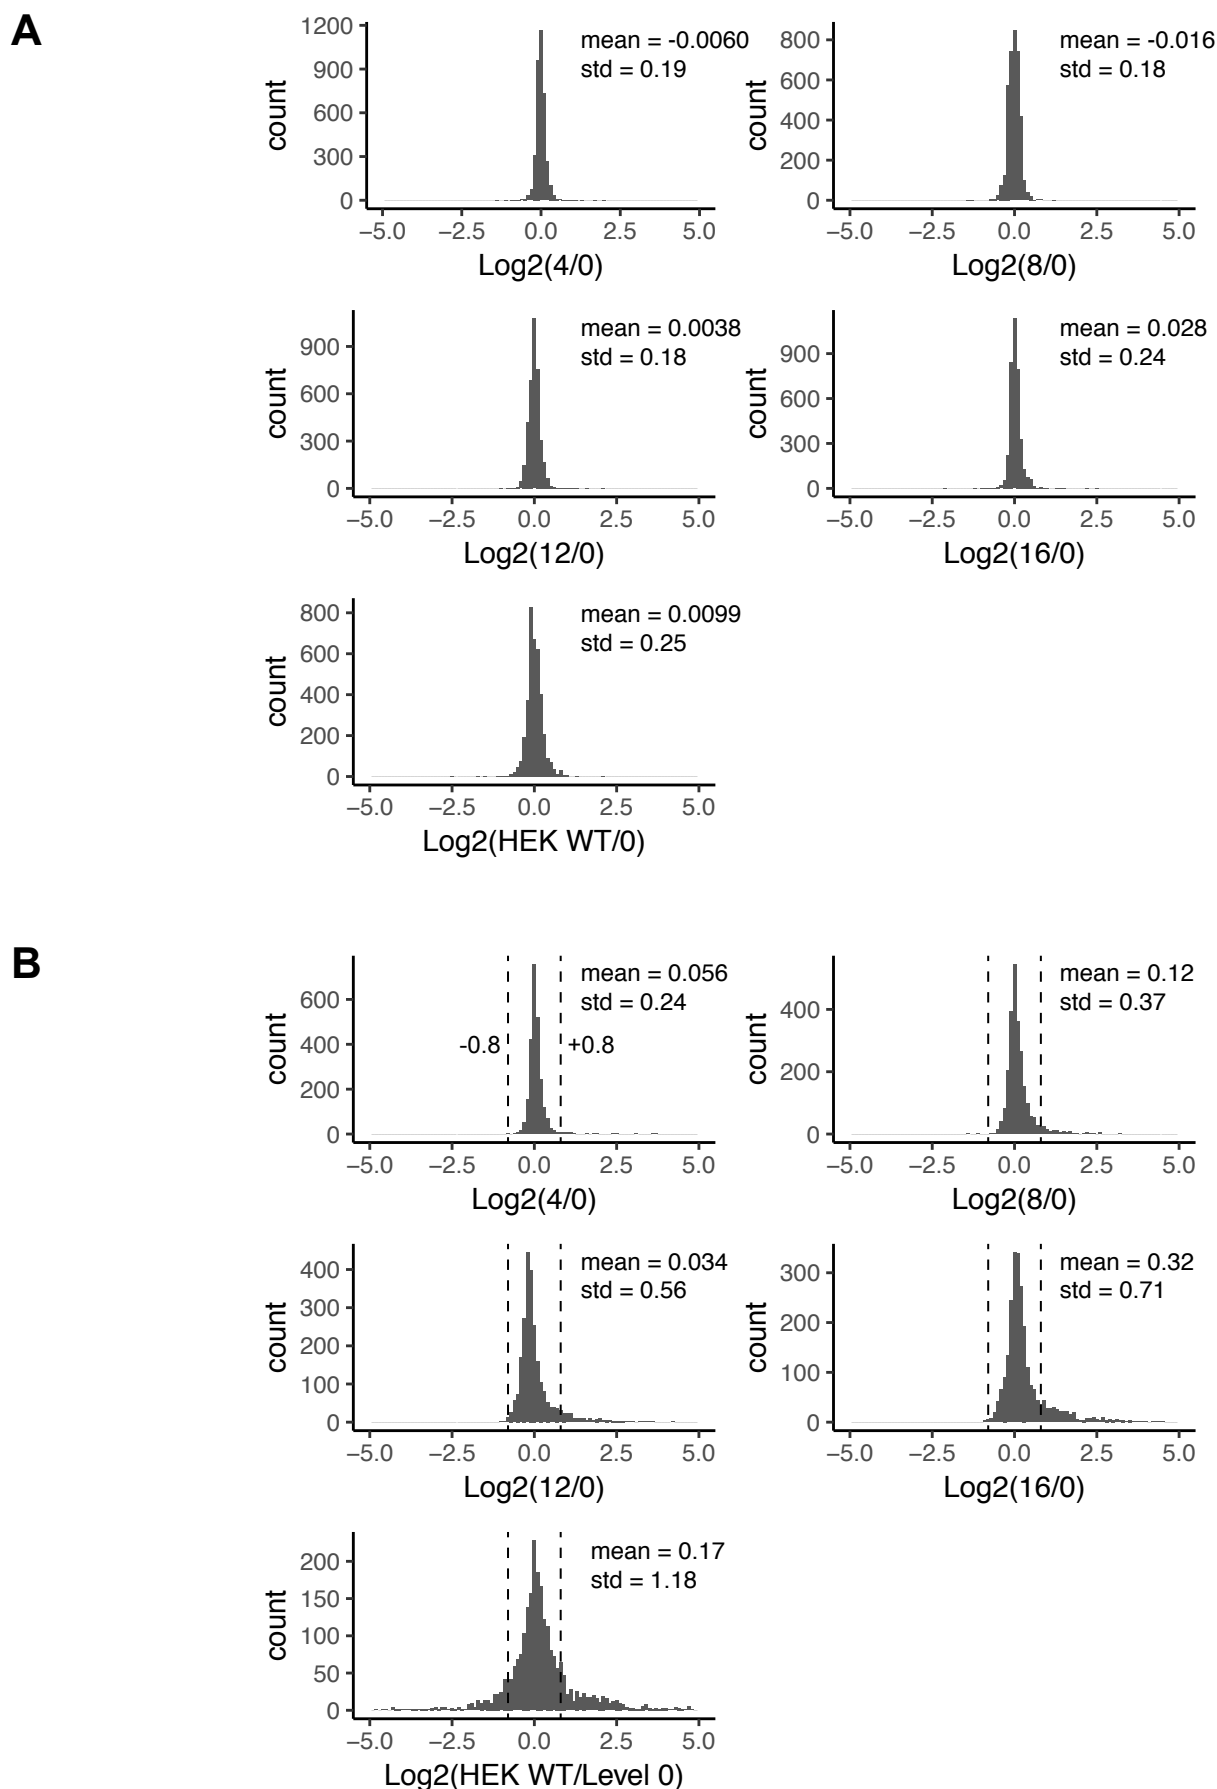

**Figure S7. Histograms of quantified peptides and O-glycopeptides from HEK<sup>ind</sup>T2. A)** LC-MS3 quantified peptides in the ratio check were normalized to HEK<sup>ind</sup>T2 cultured in absence of doxycycline (0) and log<sub>2</sub> transformed. Mean and standard deviation, assuming normal distribution, showed for each histogram. **B)** Quantified O-glycopeptides were normalized to HEK<sup>ind</sup>T2 cultured in absence of doxycycline (0) and log<sub>2</sub> transformed. Dashed vertical lines at +/- 0.8 where 0.8 (approximately 3x standard deviation at the lowest induction level) was chosen as a threshold for grouping of induced O-glycopeptides.

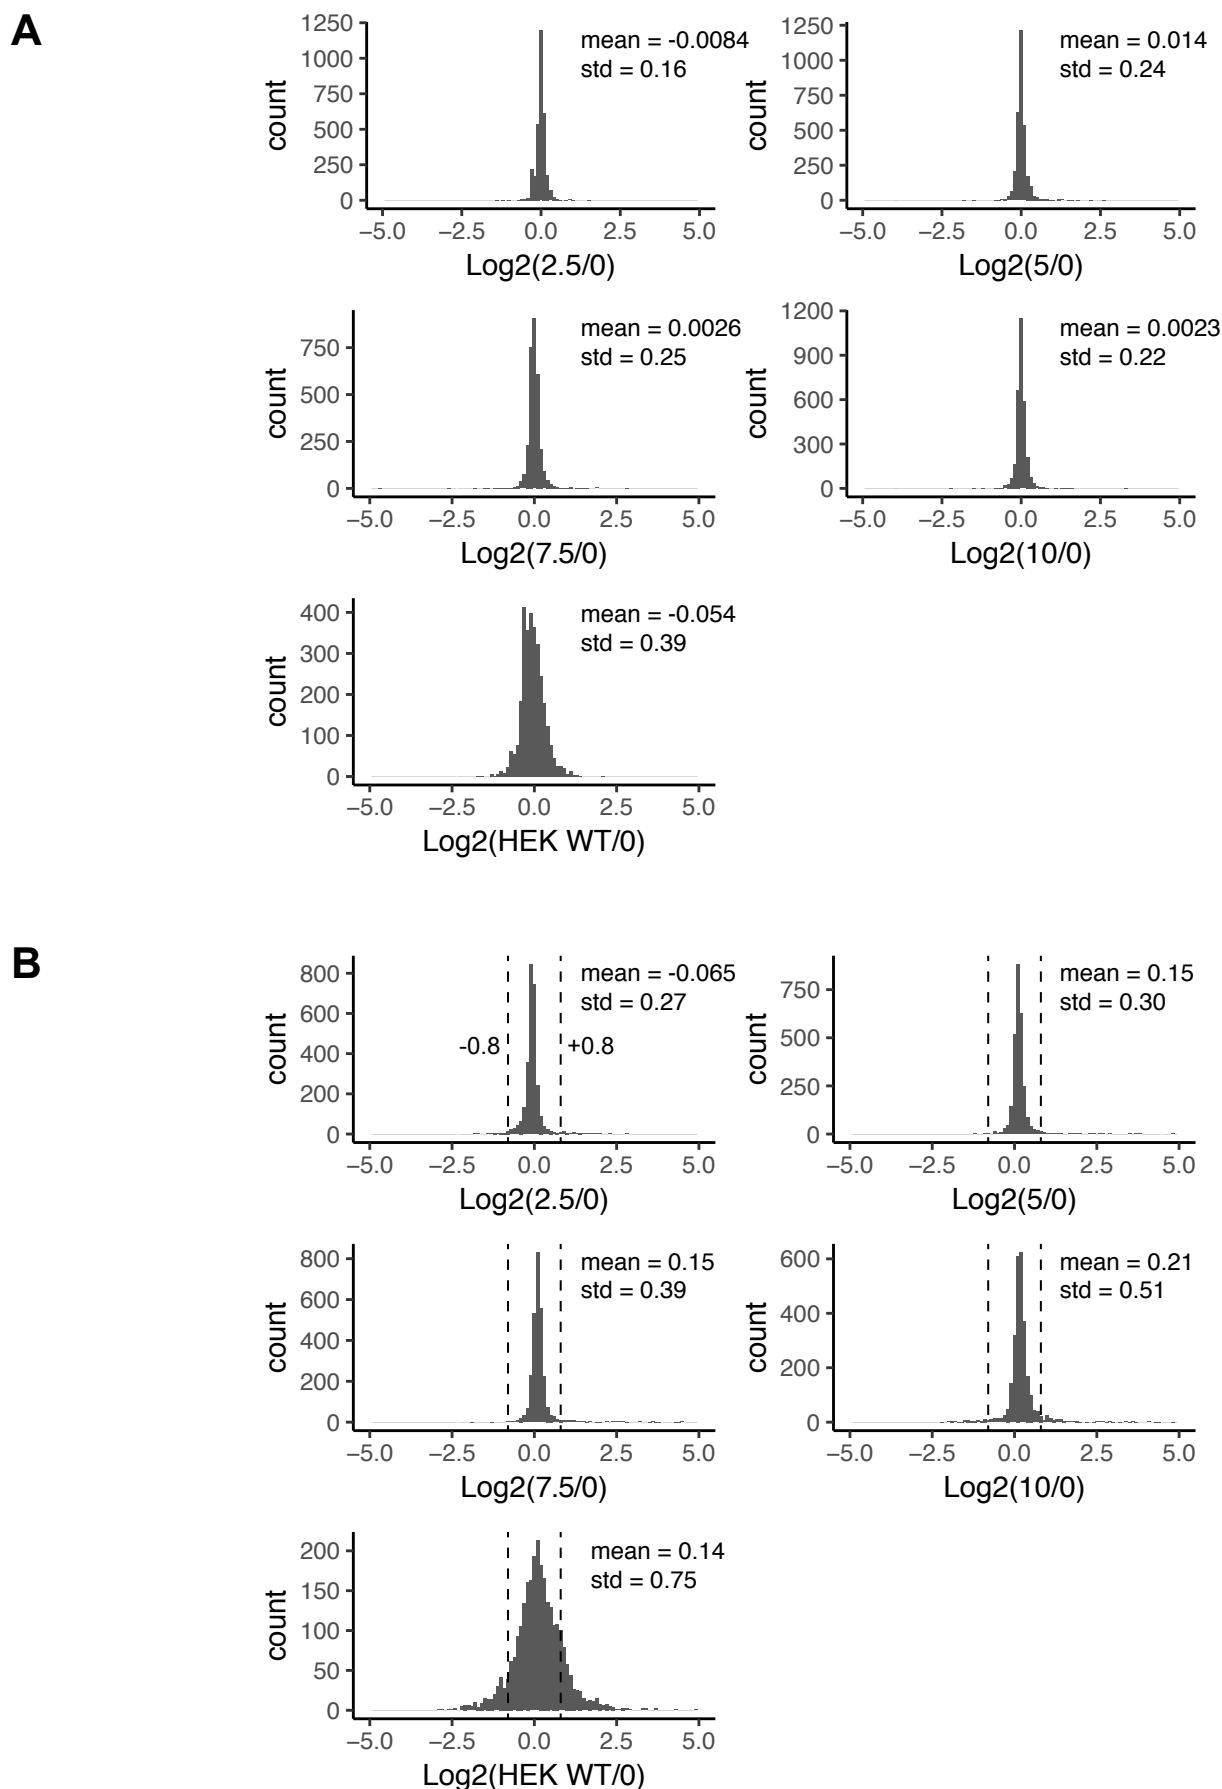

**Figure S8. Histograms of quantified peptides and O-glycopeptides from HEK<sup>ind</sup>T11. A)** LC-MS3 quantified peptides in the ratio check were normalized to HEK<sup>ind</sup>T11 cultured in absence of doxycycline (0) and log<sub>2</sub> transformed. Mean and standard deviation, assuming normal distribution, showed for each histogram. **B)** Quantified O-glycopeptides were normalized to HEK<sup>ind</sup>T11 cultured in absence of doxycycline (0) and log<sub>2</sub> transformed. Dashed vertical lines at  $\pm 0.8$  where 0.8 (approximately 3x standard deviation at the lowest induction level) was chosen as a threshold for grouping of induced O-glycopeptides.

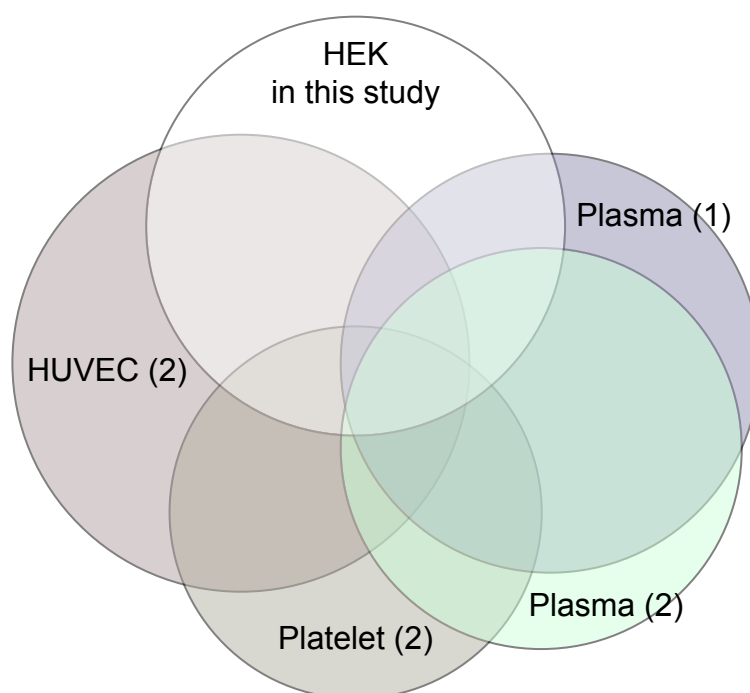

**Figure S9. Overlap of O-glycoproteins identified in this and previous studies.** Venn diagram illustration of sialyl-T (ST) O-glycoproteins identified in this study compared to those identified in Khetarpal et al. (2) and King et al. (3) from plasma, platelets and HUVEC cells.

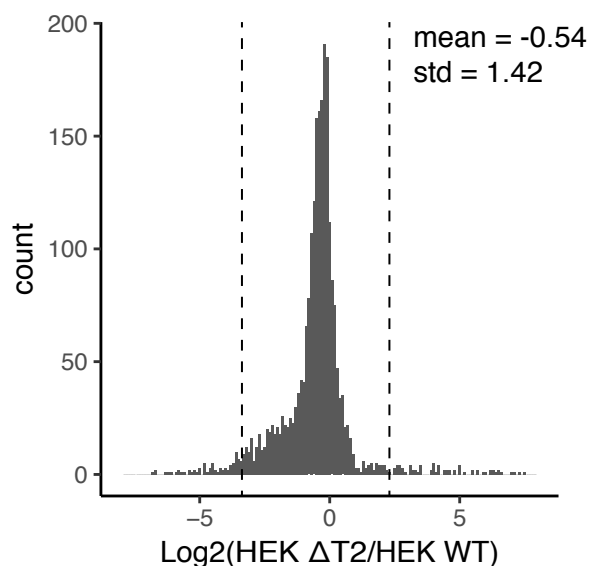

**Figure S10. Histogram of quantified O-glycopeptides from HEKΔT2.** Quantified O-glycopeptides normalized to HEK WT. Dashed vertical lines at +/- two standard deviations from the mean. As this experiments compares WT with loss-of-function T2-specific glycopeptides, minus two standard deviations from the mean was used as a cut-off (-3.38) to define O-glycopeptides significantly affected by *GALNT2* KO.

A

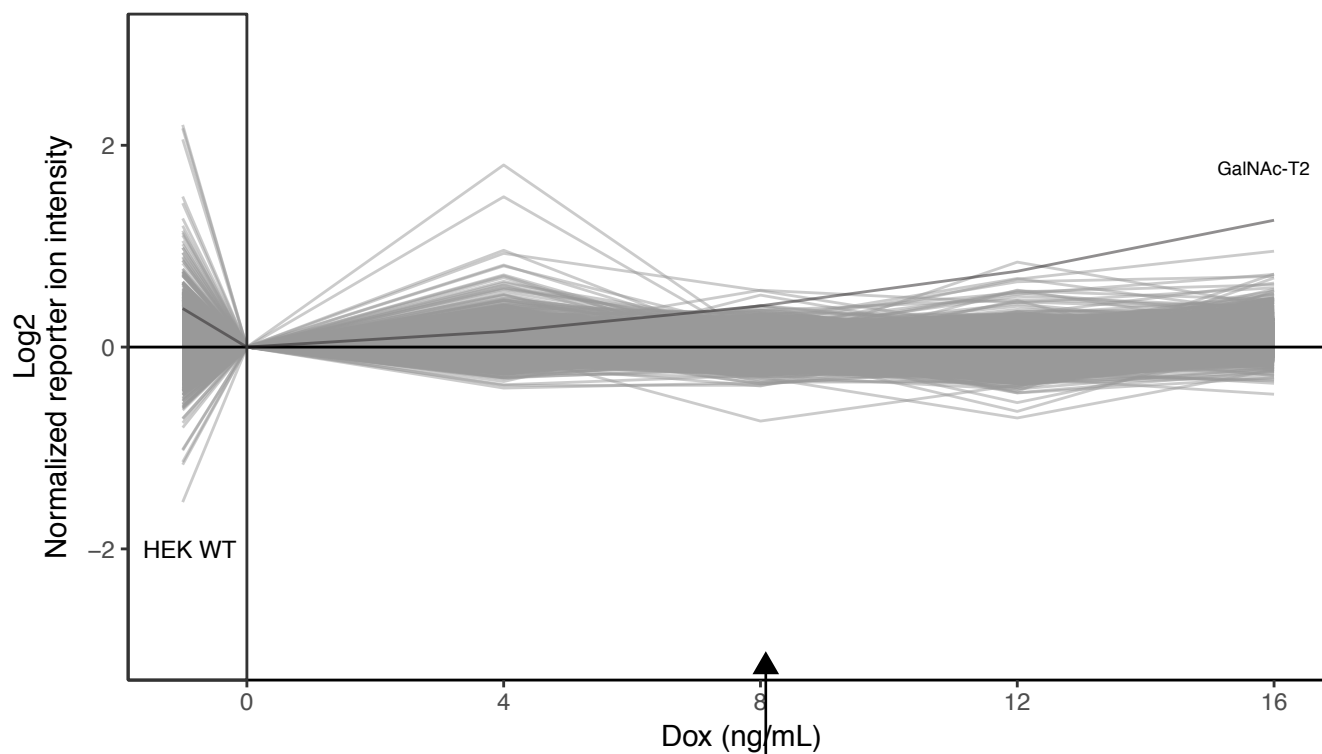

B

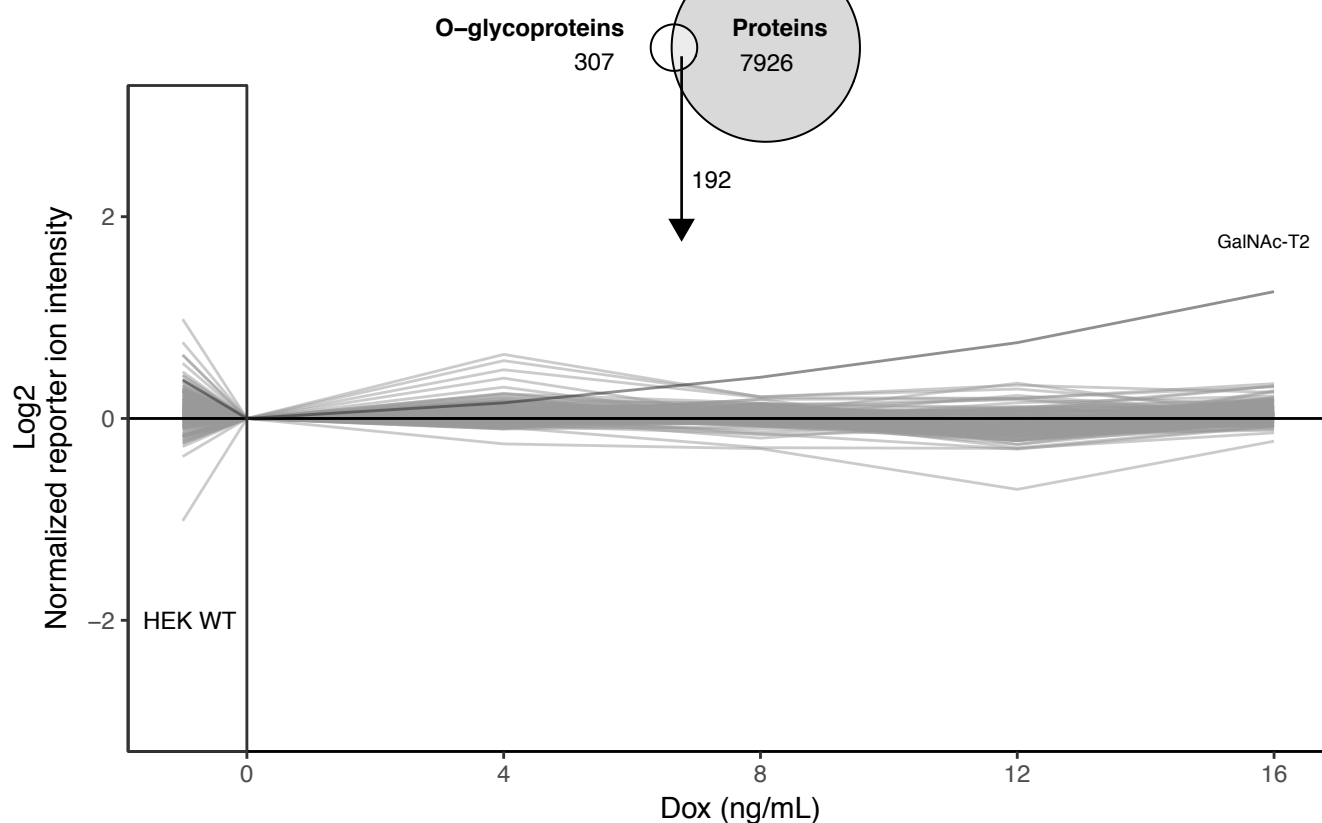

**Figure S11. Deep proteome analysis of HEK<sup>ind</sup>T2 LWAC flow-through.** **A)** In the LWAC FT peptides from 7926 proteins were quantified across all cultures. Data was normalized to HEK<sup>ind</sup>T2 cultured in absence of doxycycline, log<sub>2</sub> transformed and subsequently plotted. Each line represents a protein. GalNAc-T2 (shown in black) display a clear trend of increased quantification with increasing doxycycline concentration. **B)** Of the 307 O-glycoproteins identified in the HEK<sup>ind</sup>T2 O-glycoproteome 192 were also identified in the LWAC FT.

A

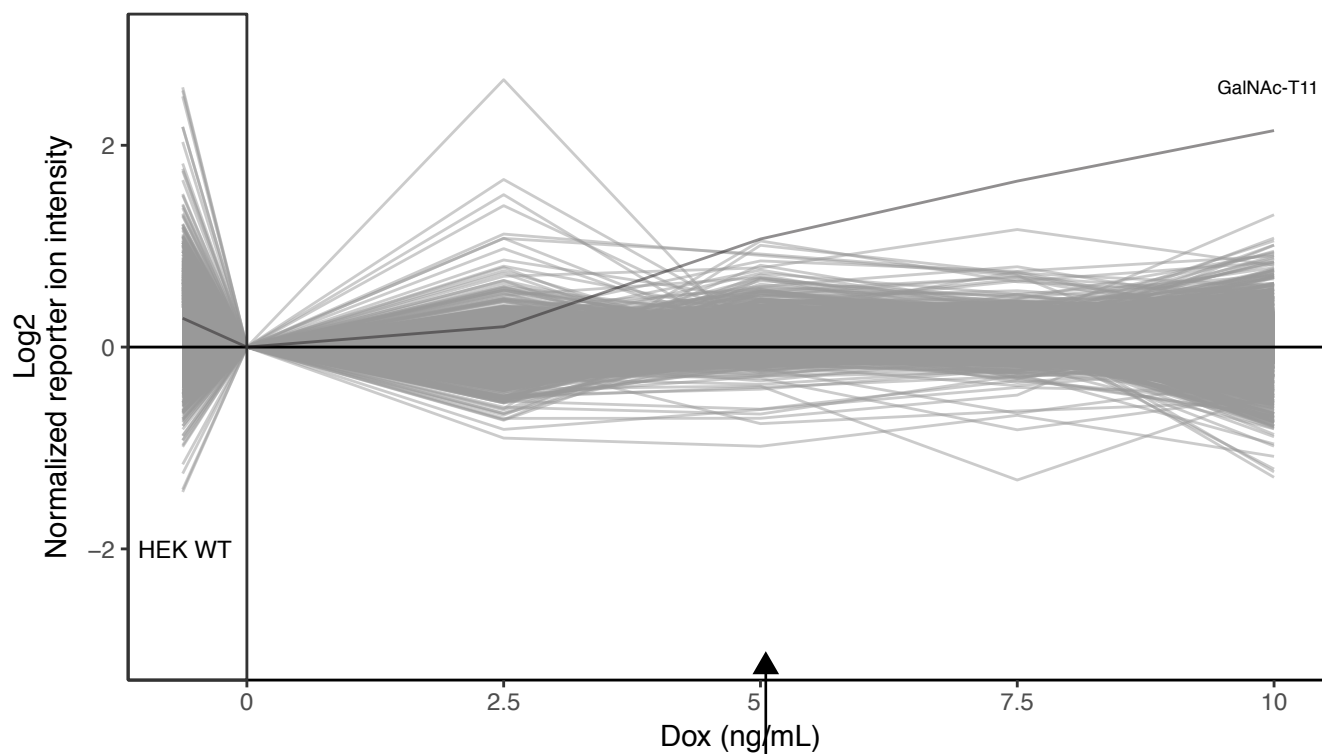

B

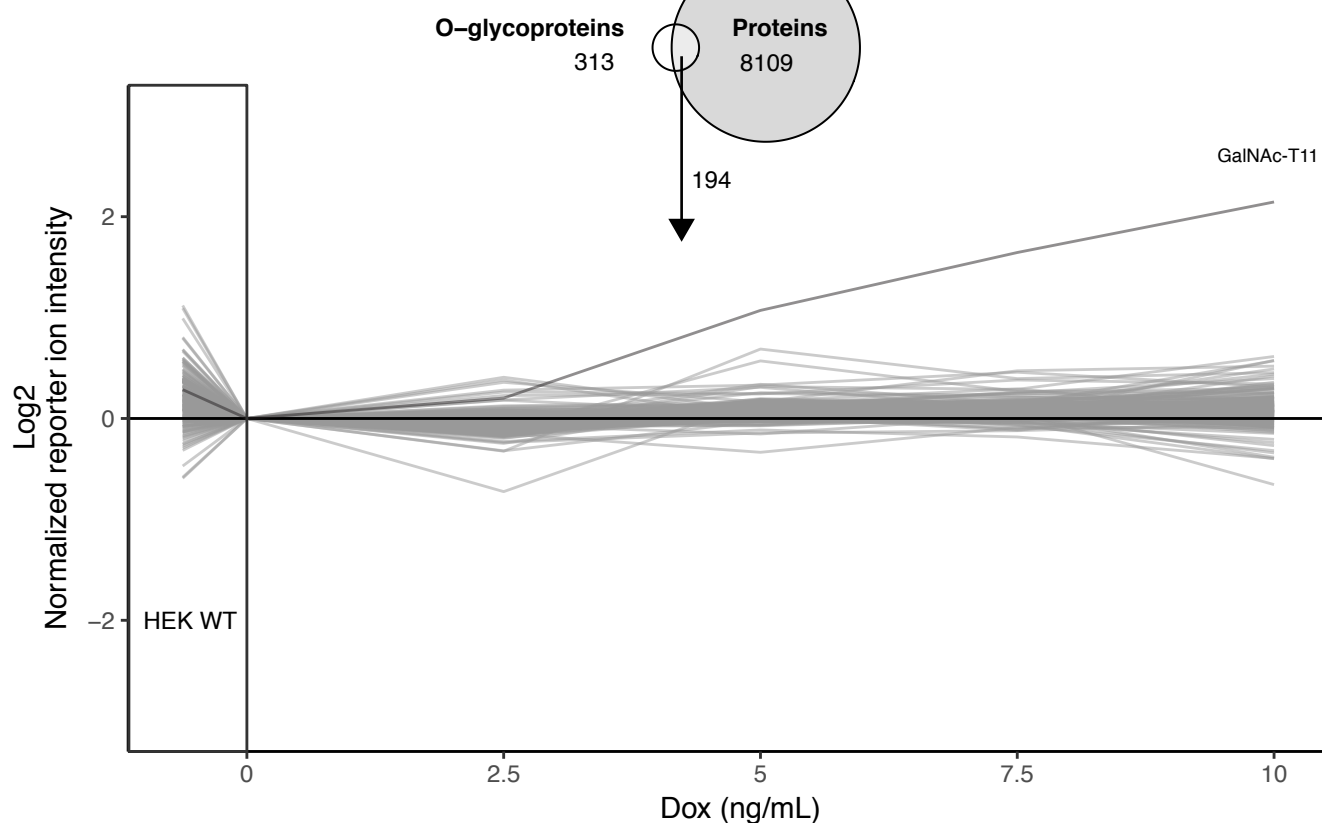

**Figure S12. Deep proteome analysis of HEK<sup>ind</sup>T11 LWAC flow-through. A)** In the LWAC FT peptides from 8109 proteins were quantified across all cultures. Data was normalized to HEK<sup>ind</sup>T11 cultured in absence of doxycycline, log<sub>2</sub> transformed and subsequently plotted. Each line represents a protein. GalNAc-T11 (shown in black) display a clear trend of increased quantification with increasing doxycycline concentration. **B)** Of the 313 O-glycoproteins identified in the HEK<sup>ind</sup>T11 O-glycoproteome 194 were also identified in the LWAC FT.

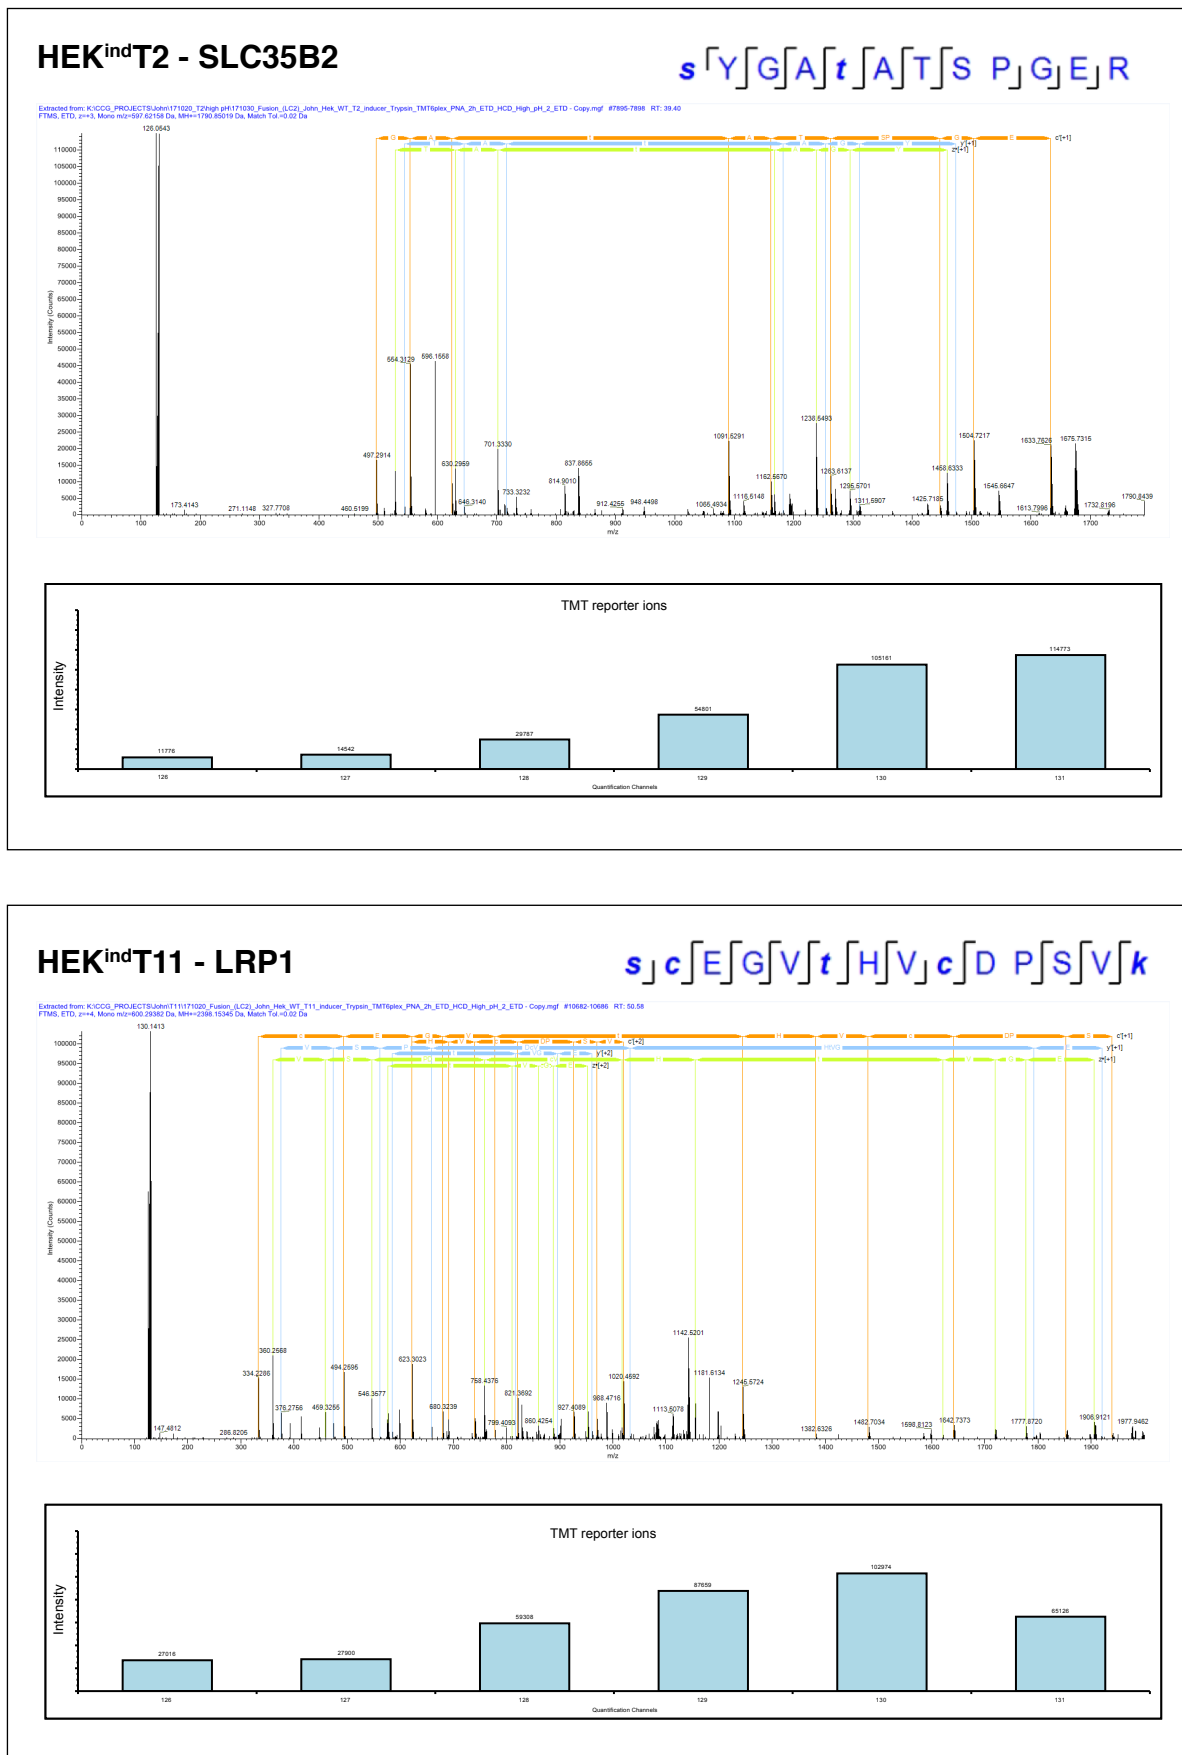

**Figure S13. Mass spectra of two induced O-glycopeptides.** Representative spectra showing O-glycopeptide identification and quantification of SLC35B2 <sup>137</sup>SYGATATSPGER<sup>148</sup> in HEK<sup>ind</sup>T2 and LRP1 LA8-9 <sup>1096</sup>SCEGV**T**HVCDPSVK<sup>1109</sup> in HEK<sup>ind</sup>T11 (glycosite shown in bold). For the given O-glycopeptides, the ETD spectrum is shown together with the TMT quantification channel values. The ETD spectrum provides unambiguous assignment of the O-glycan composition. TMT channel values were extracted from the corresponding HCD spectrum.

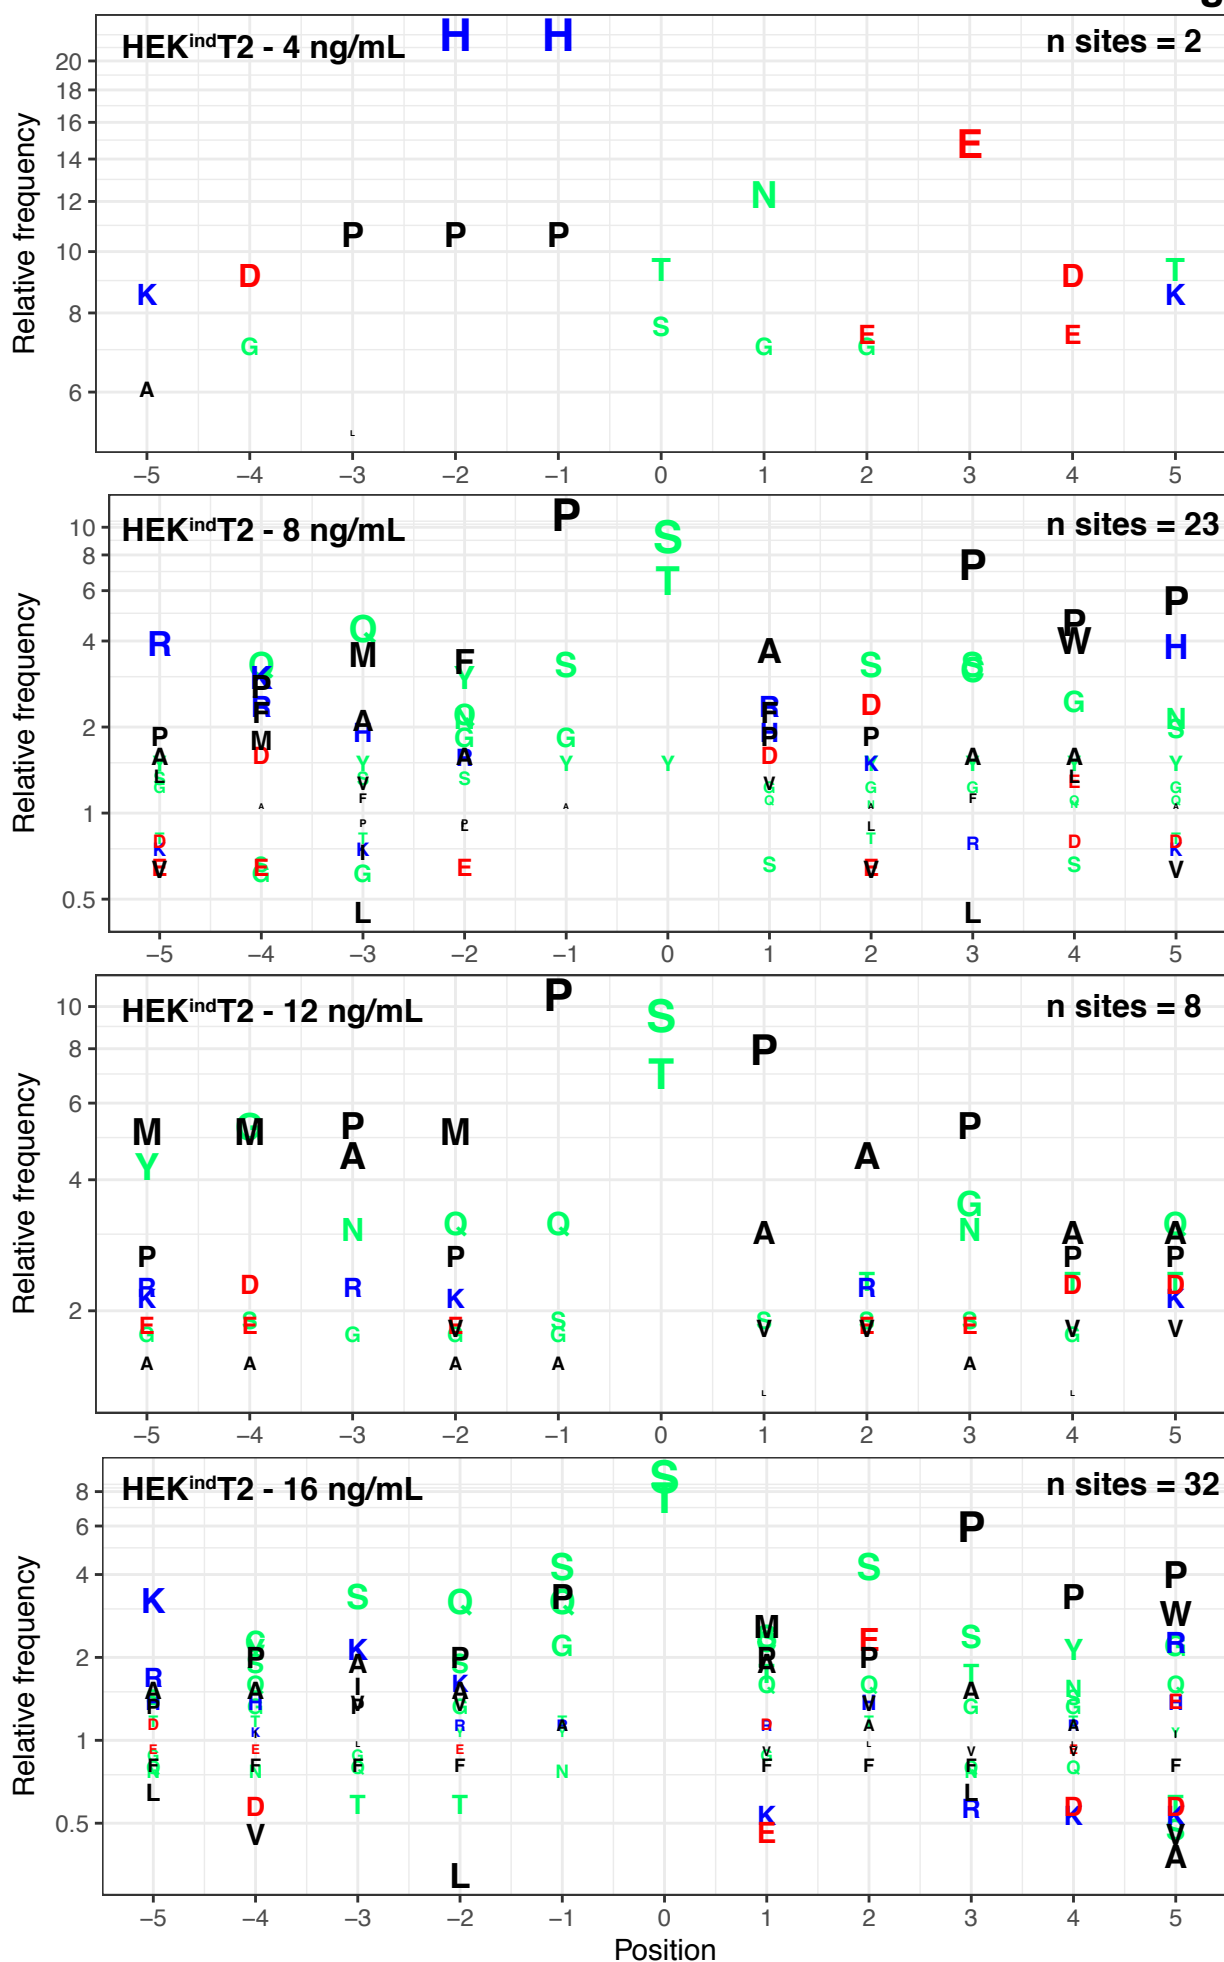

**Figure S14. Alignment of induced O-glycosites from HEK<sup>ind</sup>T2.** O-glycosites were extracted from unambiguous single-site O-glycopeptides of each group and aligned in a sequence window spanning +/- 5 amino acids from the O-glycosite. The amino acid frequency is relative to the frequency of amino acids in the UniProt human proteome database (December 2013). GalNAc-T2's known preference for proline at position -1 is evident, and prolines are frequent at position +1 and +3 for glycosites induced at a doxycycline concentration of 8 ng/mL or more.



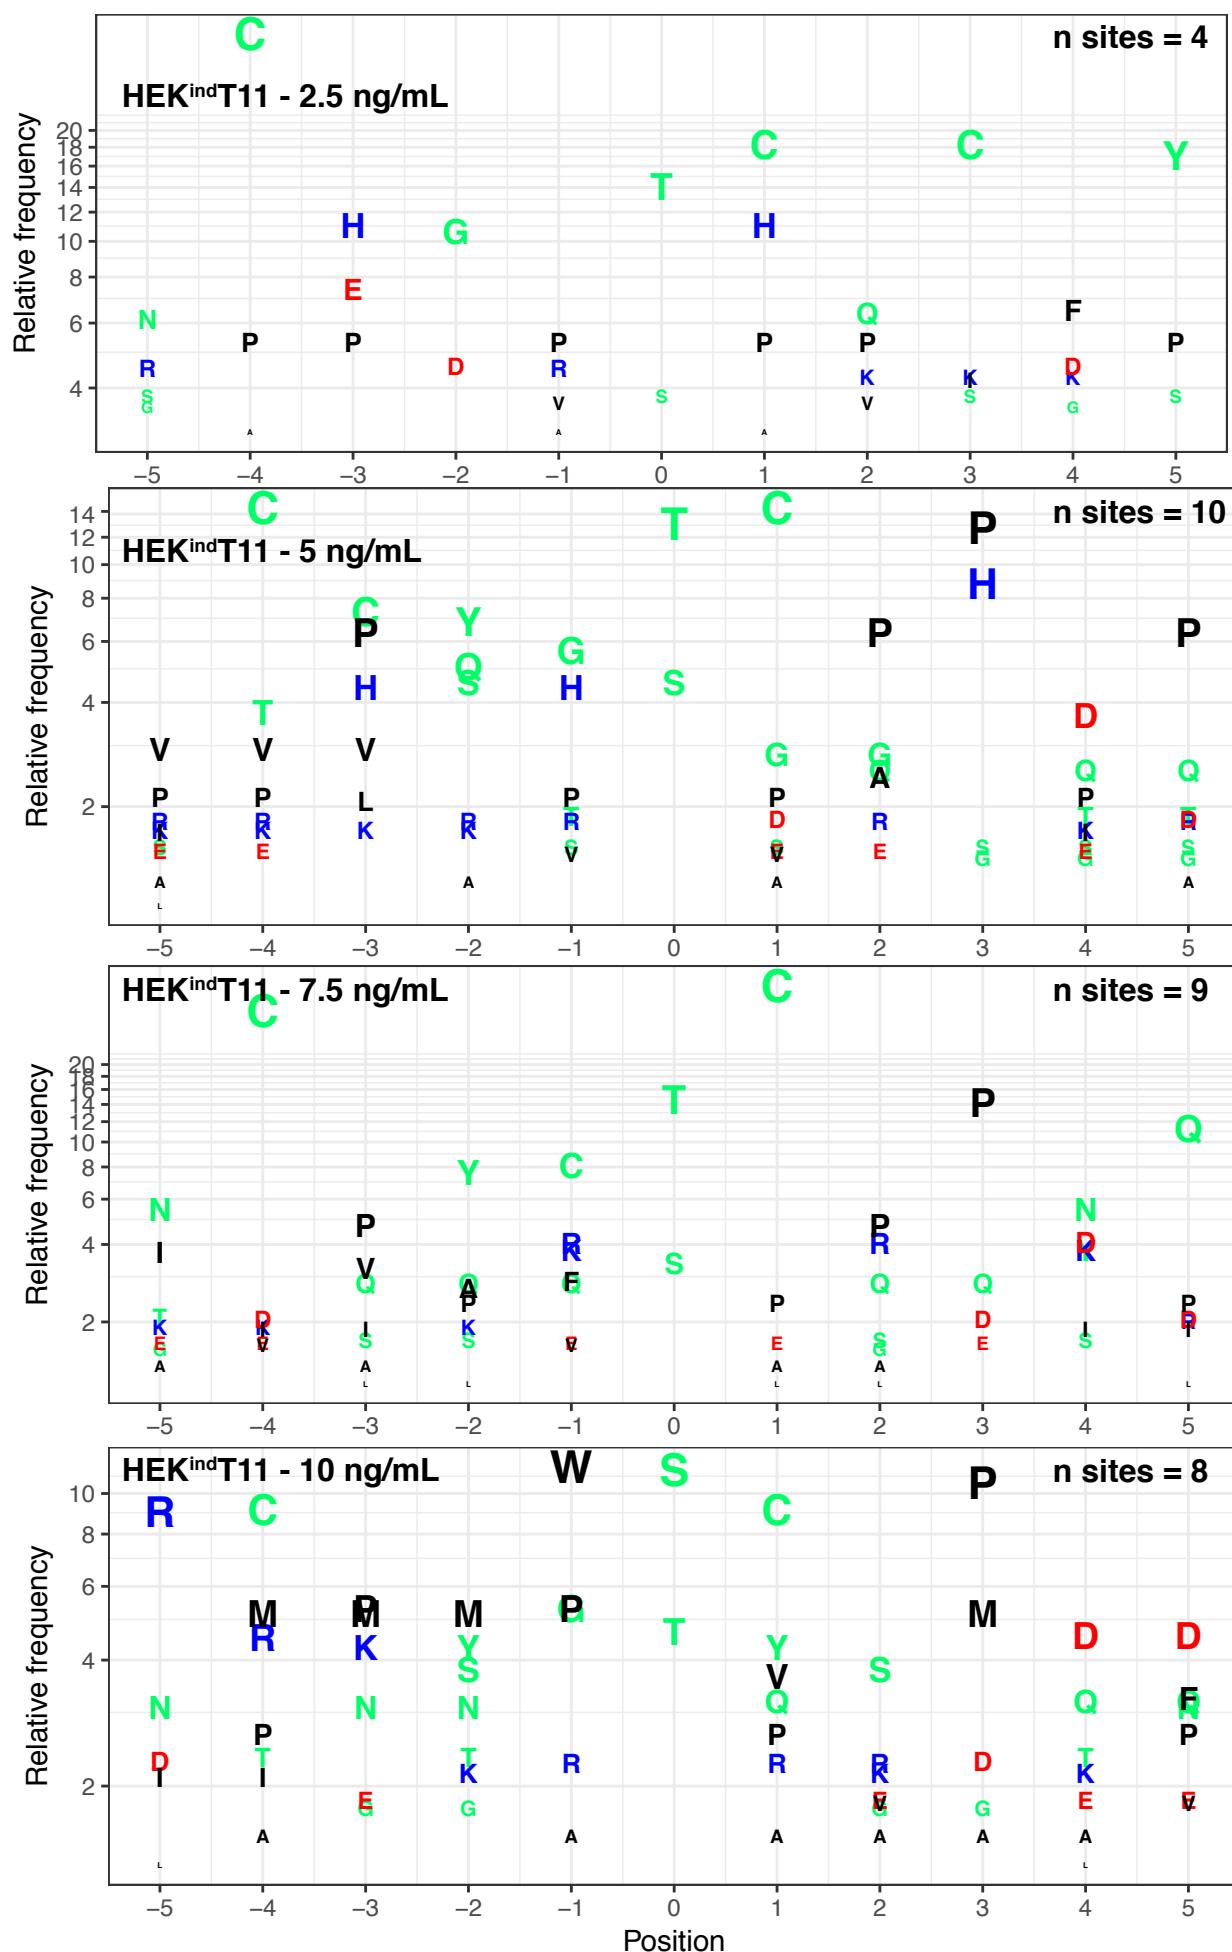

**Figure S15. Alignment of induced O-glycopeptides from HEK<sup>ind</sup>T11.** O-glycosites were extracted from unambiguous single-site O-glycopeptides of each group and aligned in a sequence window spanning +/- 5 amino acids from the O-glycosite. The amino acid frequency is relative to the frequency of amino acids in the UniProt human proteome database (December 2013). The LA linker motif  $XXC^6XXXTC^1-XX$  is highly enriched at early induction levels, 2.5 to 7.5 ng/mL of doxycycline. At 10 ng/mL a motif of Pro at position -1 and +3, similar to HEK<sup>ind</sup>T2 at 16 ng/mL, is enriched. However, the size of the underlying data is limited.

Table S1.

## In vitro glycosylation of "low-dose" responding T2-sites

| Gene ID | UniProt ID | Identified tryptic glycopeptide | Glycan                                 | Synthetic peptide sequence | GalNAc-transferase |           |          |    |    |     |     |     |     |
|---------|------------|---------------------------------|----------------------------------------|----------------------------|--------------------|-----------|----------|----|----|-----|-----|-----|-----|
|         |            |                                 |                                        |                            | T1                 | T2        | T3       | T4 | T5 | T11 | T12 | T14 | T16 |
| CPD     | O75976     | SFPDQFSTGEPALDEVPEVR            | T8(Hex(1)HexNAc(1))                    | GRDLNRSFPDQFSTGEPAL        | ++                 | +++       | ++       | -  | -  | ++  | +   | -   | +   |
| GALNT10 | Q86SR1     | ERQPDGTPGGSGAAVAPAAGQGSHSR      | 2xT                                    | YRERQPDGTPGGSGAAVAPA       | +                  | +++       | ++       | NA | -  | -   | -   | NA  | -   |
| B4GALT3 | O60512     | DQGPTFDYSHPR                    | 1xT                                    | SALFGRDQGPFTFDYSHPRDV      | -                  | +         | -        | NA | -  | -   | -   | -   | -   |
| CANX    | P27824     | APVPTGEVYFADSFDR                | 1xT                                    | PSSPKVTYTYKAPVPTGEVYFA     | -                  | ++++      | 1+/2++   | -  | NA | -   | -   | -   | (+) |
| HSPA5   | P11021     | LYGSAGPPPTGEEDTAEKDEL           | S4(Hex(1)HexNAc(1)) and or T10(HexNAc) | SKLYGSAGPPPTGEEDTAEK       | -                  | +         | -        | -* | -  | -   | -   | -   | -   |
| SLC35B2 | Q8TB61     | SYGATATSPGER                    | 1xT                                    | VMTRSYGATATSPGERFTDS       | (+)                | ++        | 1++/2(+) | NA | NA | -   | -   | -   | NA  |
| ITGA5   | P08648     | EAPSRSSASSGPQILK                | S7(Hex(1)HexNAc(1))                    | QQKREAPSRSSASSGPQILK       | +                  | 1++++/2++ | +        | NA | -  | -   | -   | -   | -   |

Table S2.

## In vitro glycosylation of "high-dose" responding T2-sites

| Gene ID | UniProt ID | Identified tryptic glycopeptide | Glycan                                   | Synthetic peptide sequence | GalNAc-transferase |          |          |       |    |     |       |     |      |
|---------|------------|---------------------------------|------------------------------------------|----------------------------|--------------------|----------|----------|-------|----|-----|-------|-----|------|
|         |            |                                 |                                          |                            | T1                 | T2       | T3       | T4    | T5 | T11 | T12   | T14 | T16  |
| TFRC    | P02786     | LAGTESPVREEPGEDFPAAR            | 1xTn_1xT                                 | LAGTESPVREEPGEDFPAAR       | ++                 | -        | -        | -     | -  | -   | -     | -   | -    |
| GOLIM4  | O00461     | EKPTRVQEVSR                     | T4(Hex(1)HexNAc(1));S11(Hex(1)HexNAc(1)) | TAREKPTRVQEVSRNNDVW        | -                  | -        | -        | -     | -  | -   | -     | -   | -    |
| SDF4    | Q9BRK5     | YSEFFTGSK                       | S2(Hex(1)HexNAc(1))                      | PEEVLYSEFFTGSKLVDYA        | -                  | -        | -        | -     | -  | -   | -     | -   | -    |
| F2RL1   | P55085     | VDGTSHVTGK                      | T4(Hex(1)HexNAc(1));T8(Hex(1)HexNAc(1))  | GRSLIGKVDGTSHVTGKGVV       | -                  | -        | 1+/2+    | -     | -  | NA  | NA    | NA  | NA   |
| NUCB2   | P80303     | KLQQGIPPSGAPAGELK               | 1xT                                      | KLQQGIPPSGAPAGELKFEPH      | -                  | -        | -        | -     | -  | -   | -     | -   | -    |
| GLCE    | O94923     | AAASESNYMNHVAK                  | 2xTn_1xT                                 | GFEKRAAAASESNYMNHVAK       | -                  | -        | -        | -     | -  | -   | -     | -   | -    |
| SEMA4D  | Q92854     | VVPKPVVAPTLVSVVQTEGSR           | 2xT                                      | KPVVAPTLVSVVQTEGSR         | -                  | +        | -        | -     | -  | -   | -     | -   | -    |
| SDC4    | P31431     | AGSGSQVPTPEPK                   | 1xT                                      | PERAGSGSQVPTPEPKLEEN       | -                  | -        | -        | -     | -  | -   | -     | -   | -    |
| SDC2    | P34741     | IPAQTK                          | 1xT                                      | LNIQNKIPAQTKSPEETDKE       | +                  | -        | ++       | +(ON) | -  | -   | -     | -   | -    |
| ERGIC2  | Q96RQ1     | STSTALPREDDSSQSPNACR            | T4(Hex(1)HexNAc(1))                      | SAFKSTSTALPREDDSSQS        | 1++++/2+           | 1+/2++++ | 1++++/2+ | NA    | +  | +   | 1+/2+ | +   | HOLE |

Table S2.

Primers used for junction PCR

| Code in Fig. S2 | Name      | Sequence 5' - 3'             |
|-----------------|-----------|------------------------------|
| A               | AAVS1 F   | CCTTACCTCTCTAGTCTGTGCTAG     |
| B               | AAVS1 R   | CGTAAGCAAACCTTAGAGGTTCTGG    |
| C               | Tet3G R   | ACTTGGCGTTGTTCCGCAGAAAG      |
| D               | Tet3G F   | GATATGCTGCCTGCTGACGCTC       |
| E T2            | GALNT2 R  | TTCCCTGGAGGGAGGGTCTCC        |
| F T2            | GALNT2 F  | ATGACAGCAGACAGAAATGGGAAC     |
| E T11           | GALNT11 R | CTCGTTGAAGATCATGCCAGCTC      |
| F T11           | GALNT11 F | CAGAAAGGCTCCGTGGCTATGG       |
| G               | SSODN F   | AGGCCGGCGGATAACTAGCTGATCGCGG |

Table S3

Table S3

Touch down PCR program

| Temp. | Time       | Cycles |
|-------|------------|--------|
| 95°C  | 15 min     |        |
| 95°C  | 30 s       | X15    |
| 72°C* | 30 s       |        |
| 72°C  | 2 min 45 s |        |
| 95°C  | 30 s       |        |
| 58°C  | 30 s       | X25    |
| 72°C  | 2 min 45 s |        |
| 72°C  | 10 min     |        |
| 12°C  | forever    |        |

\*Touch down 72°C-1°C per cycle start from cycle one

### Supplementary references

- Uhlen, M., Fagerberg, L., Hallstrom, B. M., Lindskog, C., Oksvold, P., Mardinoglu, A., Sivertsson, A., Kampf, C., Sjostedt, E., Asplund, A., Olsson, I., Edlund, K., Lundberg, E., Navani, S., Szgyarto, C. A., Odeberg, J., Djureinovic, D., Takanen, J. O., Hober, S., Alm, T., Edqvist, P. H., Berling, H., Tegel, H., Mulder, J., Rockberg, J., Nilsson, P., Schwenk, J. M., Hamsten, M., von Feilitzen, K., Forsberg, M., Persson, L., Johansson, F., Zwahlen, M., von Heijne, G., Nielsen, J., and Ponten, F. (2015) Proteomics. Tissue-based map of the human proteome. *Science* **347**, 1260419
- Khetarpal, S. A., Schjoldager, K. T., Christoffersen, C., Raghavan, A., Edmondson, A. C., Reutter, H. M., Ahmed, B., Ouazzani, R., Peloso, G. M., Vitali, C., Zhao, W., Somasundara, A. V., Millar, J. S., Park, Y., Fernando, G., Livanov, V., Choi, S., Noe, E., Patel, P., Ho, S. P., Myocardial Infarction Exome Sequencing, S., Kirchgessner, T. G., Wandall, H. H., Hansen, L., Bennett, E. P., Vakhru-shev, S. Y., Saleheen, D., Kathiresan, S., Brown, C. D., Abou Jamra, R., LeGuern, E., Clausen, H., and Rader, D. J. (2016) Loss of Function of GALNT2 Lowers High-Density Lipoproteins in Humans, Nonhuman Primates, and Rodents. *Cell Metab* **24**, 234-245
- King, S. L., Joshi, H. J., Schjoldager, K. T., Halim, A., Madsen, T. D., Dziegiel, M. H., Woetmann, A., Vakhrushev, S. Y., and Wandall, H. H. (2017) Characterizing the O-glycosylation landscape of human plasma, platelets, and endothelial cells. *Blood Advances* **1**, 429-442
